# Supplementary material for: Effects of electrical muscle stimulation on core muscle activation and physical performance in non-athletic adults: A randomized controlled trial
Source: PubMed Central journal article supplement (PMC9875983; doi:10.1097/md.0000000000032765), 2023-01-27
Supplement: medi-102-e32765-s001.pdf [file medi-102-e32765-s001.pdf]

**Table, Supplemental digital content. The detailed physical training program.**

| Week | Exercise Program                 | Protocol                   | Borg CR-10 | EMS   |       |
|------|----------------------------------|----------------------------|------------|-------|-------|
| 1-1  | Breathing (draw-in maneuver)     | (3" in & 3" out) x 20reps. | 2          | 30 Hz |       |
|      | Double legs inner sneezing       | 3" x 10reps x 2sets        |            |       |       |
|      | Dead bug 1 (legs only)           | 10reps x 2sets             |            |       |       |
|      | SLR out                          | 10(5")reps x 2sets         |            |       |       |
| 1-2  | Breathing (draw-in maneuver)     | (in 3" & out 3") x 10reps  |            |       |       |
|      | Double legs Inner sneezing       | 5" x 10reps                |            |       |       |
|      | Dead bug 1 (legs only)           | 10(5")reps x 2sets         |            |       |       |
|      | SLR out                          | 10(5")reps x 2sets         |            |       |       |
| 1-3  | Inner sneezing & crunch          | 3" x 10reps x 2sets        |            |       |       |
|      | Dead bug 2 (arms & legs)         | 10(5")reps x 2sets         |            |       |       |
|      | Bird dog 1                       | 10(5")reps x 2sets         |            |       |       |
|      | SLR in & out                     | 10(5")reps x 2sets         |            |       |       |
| 2-1  | Inner sneezing & crunch          | 3" x 10reps x 2sets        |            | 3     | 70 Hz |
|      | Dead bug 1&2                     | 10(5")reps x 2sets         |            |       |       |
|      | Bird dog 1                       | 10(5")reps x 2sets         |            |       |       |
|      | SLR in & out                     | 20reps x 2sets             |            |       |       |
| 2-2  | Inner sneezing & crunch          | 3" x 10reps x 2sets        |            |       |       |
|      | Dead bug 1&2                     | 10(5")reps x 2sets         |            |       |       |
|      | Bird dog 1&2                     | 10(5")reps x 2sets         |            |       |       |
|      | SLR in & out                     | 20reps x 2sets             |            |       |       |
| 2-3  | Inner sneezing & crunch          | 3" x 15reps x 2sets        |            |       |       |
|      | Dead bug 1&2                     | 10(5") x 2sets             |            |       |       |
|      | Bird dog 1&2                     | 10(5") x 2sets             |            |       |       |
|      | SLR in & out                     | 20reps x 2sets             |            |       |       |
| 3    | Dead bug 1                       | 10(5")reps x 2sets         | 4          |       |       |
|      | Reverse crunch                   | 15(5")reps x 2sets         |            |       |       |
|      | Bird dog 2                       | 10(5")reps x 2sets         |            |       |       |
|      | Plank (front & half side)        | 20" x 2sets                |            |       |       |
|      | SLR in & out                     | 15reps x 2sets             |            |       |       |
| 4    | Bridge                           | 30reps x 2sets             | 5          |       |       |
|      | Reverse crunch                   | 30reps x 2sets             |            |       |       |
|      | Plank (front & half side)        | 40"x2sets & 30"x2sets      |            |       |       |
|      | SLR in                           | 20reps x 2sets             |            |       |       |
| 5    | Bridge                           | 30reps x 2sets             | 6          |       |       |
|      | Reverse Crunch                   | 30reps x 2sets             |            |       |       |
|      | Half side plank up down          | 20reps x 2sets             |            |       |       |
|      | Supine SLR                       | 20reps x 2sets             |            |       |       |
|      | Front Plank                      | 1"x2sets                   |            |       |       |
| 6    | Mini squat side walk w/mini band | 20reps x 2sets             | 7          |       |       |
|      | SL bridge side move w/mini band  | 10reps x 2sets             |            |       |       |
|      | Side plank up down w/mini band   | 15reps x 2sets             |            |       |       |
|      | Full crunch                      | 20reps x 2sets             |            |       |       |
|      | Supine DL split                  | 30" x 2sets                |            |       |       |

|     |                                  |                |     |  |
|-----|----------------------------------|----------------|-----|--|
|     | Front Plank                      | 1' x 2sets     |     |  |
| 7-8 | Mini squat side walk w/mini band | 20reps x 3sets | 8~9 |  |
|     | Superman                         | 20reps x 3sets |     |  |
|     | Side plank Standard              | 1' x 3sets     |     |  |
|     | Bicycle crunch                   | 1' x 3sets     |     |  |

SLR = straight leg raising, SL = single leg, DL = double leg, w/ = with, '' = second, ' = minute, reps = repetitions
